# Supplementary material for: The lost years: An integrative review of the mental health, educational, and social impact of the pandemic on children and adolescents from 2019 to 2022.
Source: Springer Nature journal article supplement (doi:10.1007/s40817-024-00160-0), 2024-03-01
Supplement: MOESM1 [file 26955832]

## Appendix A

### NEWCASTLE-OTTOWA QUALITY ASSESSMENT SCALE

(adapted for cross-sectional studies)

**Selection:** (maximum of 5 points)

- 1) Representativeness of the cases:
  - a) Truly representative of the average in the target population (consecutive or random sampling of cases). \*
  - b) Somewhat representative of the average in the target population (non-random sampling, stratified sampling). \*
  - c) Selected demographic group of users.
  - d) No description of the sampling strategy.
  
- 2) Sample size:
  - a) Justified and satisfactory. \*
  - b) Not justified
  
- 3) 3) Non-Response rate:
  - a) The response rate is satisfactory ( $\geq 75\%$ ) \*
  - b) The response rate is unsatisfactory or no description is provided.
  
- 4) Ascertainment of the screening/surveillance tool:
  - a) Validated screening/ surveillance tool. \*\*
  - b) Non-validated screening/surveillance tool, but the tool is available or described. \*
  - c) No description of the measurement tool.

**Comparability:** (maximum of 1 point)

- 1) The potential confounders were investigated by subgroup analysis or multivariable analysis.
  - a) The study investigates potential confounders. \*
  - b) The study does not investigate potential confounders

**Outcome:** (maximum of 3 points)

- 1) Assessment of the outcome:
  - a) Independent blind assessment. \*\*
  - b) Record linkage. \*\*
  - c) Self-report. \*
  - d) No description.
  
- 2) Statistical test:
  - a) The statistical test used to analyze the data is clearly described and appropriate and the measurement of the association is presented, including confidence intervals and the probability level (p-value) \*
  - b) The statistical test is not appropriate, not described, or incomplete.

---

This scale has been adapted from the Newcastle-Ottawa Quality Assessment Scale for cohort and case-control studies, and the adapted scale used by Modesti et al. (2022) to perform a quality assessment of cross-sectional studies for the integrative review, “The Lost Years: An Integrative Review of Mental Health and Social Impact of the Pandemic on Children and Adolescents”. This scale is a modified version of the NOS scale, also used by several other studies that have felt the need to adapt the NOS scale to appropriately assess the quality of cross-sectional studies.

A score of 7 or more is considered a “good” study (see McPheeters et al. 2012; see Appendix G page 103-104 in <http://www.ncbi.nlm.nih.gov/pubmedhealth/PMH0049229/>). Therefore, we used this criterion as a cut-off for good quality study.

## References

McPheeters, M.L., Kripalini, S., Peterson, N.B., Idowu, R.T. et al. (2012). Quality Improvement Interventions To Address Health Disparities. Evidence Report/Technology Assessment. Rockville (MD): Agency for Healthcare Research and Quality (US). <http://www.ncbi.nlm.nih.gov/pubmedhealth/PMH0049222/pdf/TOC.pdf>

Modesti, P. A., Reboldi, G., & Cappuccio, F. P. (2016). Newcastle-Ottawa Quality Assessment Scale (adapted for cross-sectional studies). *PLoS One*, *11*(1), e0147601.

Wells, G. A., Shea, B., O'Connell, D., Peterson, J., Welch, V., et al. The Newcastle-Ottawa Scale (NOS) for assessing the quality of nonrandomized studies in meta-analysis. 2011.

[http://www.ohri.ca/programs/clinical\\_epidemiology/oxford.asp](http://www.ohri.ca/programs/clinical_epidemiology/oxford.asp)
